# Supplementary material for: Comparing Immune Responses to Inactivated Vaccines against SARS-CoV-2 between People Living with HIV and HIV-Negative Individuals: A Cross-Sectional Study in China
Source: MDPI journal article supplement (doi:10.3390/v14020277), 2022-01-28
Supplement: s1 [file s1]

**Table S1. Comparing sero-positivity of immunogenicity indicators between different subgroups of PLWHA and HIV-negative individuals**

|                                                                                       | SARS-Cov-2 total antibody |                       |          | SARS-Cov-2 neutralizing activity |                       |          | S IgG |                |          | T cell specific immune response |                       |          |
|---------------------------------------------------------------------------------------|---------------------------|-----------------------|----------|----------------------------------|-----------------------|----------|-------|----------------|----------|---------------------------------|-----------------------|----------|
|                                                                                       | %                         | AOR<br>(95%CI)        | P values | %                                | AOR<br>(95%CI)        | P values | %     | AOR<br>(95%CI) | P values | %                               | AOR<br>(95%CI)        | P values |
| Reference: Fully vaccinated HIV-negative individuals (n=51)                           | 98.0                      | Ref                   | Ref      | 82.4                             | Ref                   | Ref      | 100   | Ref            | Ref      | 80.4                            | Ref                   | Ref      |
| Fully vaccinated PLWHA (n=94)                                                         | 81.9                      | 0.12<br>(0.01, 1.15)  | .07      | 71.3                             | 0.65<br>(0.20, 2.10)  | .48      | 92.6  | N.A.           | N.A.     | 50.0                            | 0.12<br>(0.04, 0.38)  | <.001    |
| Fully vaccinated PLWHA with CD4+ T cell counts<500 and detectable viral load (n=7)    | 28.6                      | N.A.                  | N.A.     | 28.6                             | 0.03<br>(0.001, 0.95) | .048     | 57.1  | N.A.           | N.A.     | 14.3                            | N.A.                  | N.A.     |
| Fully vaccinated PLWHA with CD4+ T cell counts<500 and undetectable viral load (n=16) | 81.3                      | N.A.                  | N.A.     | 56.3                             | 0.26<br>(0.03, 1.24)  | .24      | 100   | N.A.           | N.A.     | 43.8                            | 0.30<br>(0.002, 0.54) | .02      |
| Fully vaccinated PLWHA with CD4+ T cell counts≥500 and detectable viral load (n=28)   | 78.6                      | 0.04<br>(0.001, 1.27) | .07      | 75.0                             | 0.82<br>(0.12, 5.49)  | .83      | 85.7  | N.A.           | N.A.     | 39.3                            | 0.03<br>(0.01, 0.25)  | .001     |
| Fully vaccinated PLWHA with CD4+ T cell counts≥500 and undetectable viral load (n=43) | 93.0                      | 0.52<br>(0.01, 46.30) | .78      | 81.4                             | 1.03<br>(0.20, 5.41)  | .97      | 100   | N.A.           | N.A.     | 65.1                            | 0.17<br>(0.03, 0.86)  | .03      |

AOR: adjusted odds ratios, odds ratios adjusted for background characteristics with significant between-group difference in Table 1 (age group, gender, presence of chronic conditions other than HIV, vaccine type, time interval between first and second dose, and time since the completion of the second dose)

Table S2. Unadjusted correlation coefficients of factors associated with SARS-CoV-2 total antibody, neutralizing activity, S-IgG, and T cell specific immune response levels among people living with HIV (PLWH) (n=129).

|                                                    | Total antibody          |          | Neutralizing activity   |          | S-IgG                    |             | T cell specific immune response |          |
|----------------------------------------------------|-------------------------|----------|-------------------------|----------|--------------------------|-------------|---------------------------------|----------|
|                                                    | Unadjusted B<br>(95%CI) | P values | Unadjusted B<br>(95%CI) | P values | Unadjusted B<br>(95%CI)  | P<br>values | Unadjusted B<br>(95%CI)         | P values |
| <b>Socio-demographics</b>                          |                         |          |                         |          |                          |             |                                 |          |
| Age (years)                                        |                         |          |                         |          |                          |             |                                 |          |
| 18-29                                              | Ref                     | Ref      | Ref                     | Ref      | Ref                      | Ref         | Ref                             | Ref      |
| 30-39                                              | -0.06<br>(-0.57, 0.45)  | .81      | 0.06<br>(-0.14, 0.25)   | .58      | 0.03<br>(-0.26, 0.32)    | .83         | -0.07<br>(-0.51, 0.38)          | .77      |
| 40-49                                              | 0.17<br>(-0.52, 0.86)   | .63      | 0.08<br>(-0.18, 0.35)   | .54      | -0.09<br>(-0.48, 0.31)   | .67         | -0.08<br>(-0.69, 0.53)          | .80      |
| 50-59                                              | -0.32<br>(-1.51, 0.87)  | .60      | -0.03<br>(-0.49, 0.43)  | .91      | 0.03<br>(-0.66, 0.71)    | .94         | -0.56<br>(-1.62, 0.49)          | .29      |
| Gender                                             |                         |          |                         |          |                          |             |                                 |          |
| Male                                               | Ref                     | Ref      | Ref                     | Ref      | Ref                      | Ref         | Ref                             | Ref      |
| Female                                             | 1.47<br>(-1.02, 3.97)   | .24      | 0.77<br>(-0.18, 1.73)   | .11      | 0.63<br>(-0.81, 2.06)    | .39         | 1.14<br>(-1.07, 3.34)           | .31      |
| Presence of chronic conditions other than HIV/ADIS |                         |          |                         |          |                          |             |                                 |          |
| No                                                 | Ref                     | Ref      | Ref                     | Ref      | Ref                      | Ref         | Ref                             | Ref      |
| Yes                                                | 0.12<br>(-0.42, 0.66)   | .66      | -0.07<br>(-0.28, 0.14)  | .52      | -0.01<br>(-0.30, 0.32)   | .95         | -0.20<br>(-0.68, 0.28)          | .41      |
| <b>Characteristics related to HIV infection</b>    |                         |          |                         |          |                          |             |                                 |          |
| Years since HIV diagnosis (years)                  |                         |          |                         |          |                          |             |                                 |          |
| ≤1                                                 | Ref                     | Ref      | Ref                     | Ref      | Ref                      | Ref         | Ref                             | Ref      |
| 2-5                                                | 0.55<br>(-0.12, 1.22)   | .11      | 0.21<br>(-0.05, 0.46)   | .12      | 0.21<br>(-0.18, 0.60)    | .28         | 0.46<br>(-0.14, 1.06)           | .13      |
| 6-10                                               | 0.82<br>(0.10, 1.53)*   | .03      | 0.33<br>(0.05, 0.60)*   | .02      | 0.33<br>(-0.09, 0.74)    | .12         | 0.56<br>(-0.08, 1.19)†          | .09      |
| >10                                                | 0.59<br>(-0.20, 1.38)   | .14      | 0.22<br>(-0.08, 0.53)   | .15      | 0.23<br>(-0.23, 0.69)    | .32         | 0.55<br>(-0.15, 1.26)           | .12      |
| Viral load (cp/mL)                                 |                         |          |                         |          |                          |             |                                 |          |
| Undetectable                                       | Ref                     | Ref      | Ref                     | Ref      | Ref                      | Ref         | Ref                             | Ref      |
| 61-200                                             | -0.39<br>(-0.89, 0.10)  | .12      | -0.17<br>(-0.36, 0.03)† | .099     | -0.33<br>(-0.61, -0.05)* | .02         | -0.15<br>(-0.61, 0.30)          | .50      |
| >200                                               | -1.10)                  | <.001    | -0.23                   | .051     | -0.68                    | <.001       | -0.60                           | .03      |

|                                                        |                           |       |                         |       |                           |       |                        |       |
|--------------------------------------------------------|---------------------------|-------|-------------------------|-------|---------------------------|-------|------------------------|-------|
|                                                        | (-1.69, -0.51)            |       | (-0.47, 0.001)†         |       | (-1.01, -0.34)            |       | (-1.14, -0.06)*        |       |
| CD4+ T cell count (cells/μL)                           |                           |       |                         |       |                           |       |                        |       |
| <500                                                   | Ref                       | Ref   | Ref                     | Ref   | Ref                       | Ref   | Ref                    | Ref   |
| 500-1,000                                              | 0.41<br>(-0.10, 0.93)     | .11   | 0.13<br>(-0.07, 0.33)   | .20   | 0.16<br>(-0.14, 0.45)     | .31   | 0.59<br>(0.14, 1.04)*  | .01   |
| >1,000                                                 | 0.61<br>(-0.15, 1.36)     | .11   | 0.14<br>(-0.15, 0.44)   | .34   | 0.24<br>(-0.20, 0.68)     | .28   | 0.48<br>(-0.18, 1.14)  | .16   |
| On ART                                                 |                           |       |                         |       |                           |       |                        |       |
| No                                                     | Ref                       | Ref   | Ref                     | Ref   | Ref                       | Ref   | Ref                    | Ref   |
| Yes                                                    | 0.47<br>(-0.99, 1.93)     | .52   | 0.12<br>(-0.44, 0.68)   | .67   | 0.13<br>(-0.71, 0.97)     | .76   | 0.34<br>(-0.95, 1.62)  | .61   |
| <b>SARS-CoV-2 vaccination</b>                          |                           |       |                         |       |                           |       |                        |       |
| SARS-CoV-2 vaccination status                          |                           |       |                         |       |                           |       |                        |       |
| Partially vaccinated                                   | Ref                       | Ref   | Ref                     | Ref   | Ref                       | Ref   | Ref                    | Ref   |
| 0-14 days after fully vaccinated                       | 0.68<br>(0.11, 1.25)*     | .02   | 0.27<br>(0.02, 0.51)*   | .03   | 0.49<br>(0.17, 0.80)**    | .003  | 0.07<br>(-0.55, 0.69)  | .82   |
| 15-28 days after fully vaccinated                      | 2.11<br>(1.68, 2.55)      | <.001 | 0.72<br>(0.54, 0.91)    | <.001 | 1.26<br>(1.02, 1.50)      | <.001 | 1.08<br>(0.61, 1.54)   | <.001 |
| 29-56 days after fully vaccinated                      | 1.79<br>(1.32, 2.27)      | <.001 | 0.49<br>(0.28, 0.69)    | <.001 | 1.08<br>(0.82, 1.35)      | <.001 | 0.94<br>(0.42, 1.45)   | <.001 |
| 57-84 days after fully vaccinated                      | 1.36<br>(0.74, 1.97)      | <.001 | 0.38<br>(0.12, 0.65)**  | .01   | 0.75<br>(0.40, 1.09)      | <.001 | -0.07<br>(-0.74, 0.59) | .83   |
| >84 days after fully vaccinated                        | 1.31<br>(0.20, 2.41)*     | .02   | 0.15<br>(-0.33, 0.62)   | .55   | 0.69<br>(0.07, 1.31)*     | .03   | 0.40<br>(-0.80, 1.60)  | .51   |
| Type of SARS-CoV-2 vaccine                             |                           |       |                         |       |                           |       |                        |       |
| Sinopharm                                              | Ref                       | Ref   | Ref                     | Ref   | Ref                       | Ref   | Ref                    | Ref   |
| Sinovac-CoronaVac                                      | 0.71<br>(0.28, 1.13)**    | .001  | 0.23<br>(-0.07, 0.40)** | .006  | 0.31<br>(0.06, 0.55)*     | .02   | 0.31<br>(-0.08, 0.69)  | .12   |
| Time interval (days) between the prime and second dose |                           |       |                         |       |                           |       |                        |       |
| <21 days                                               | Ref                       | Ref   | Ref                     | Ref   | Ref                       | Ref   | Ref                    | Ref   |
| 21-28 days                                             | 1.22<br>(0.74, 1.69)***   | <.001 | 0.42<br>(0.22, 0.64)    | <.001 | 0.67<br>(0.41, 0.94)      | <.001 | 0.52<br>(-0.02, 1.06)† | .06   |
| >28 days                                               | 1.28<br>(0.67, 1.89)***   | <.001 | 0.39<br>(0.12, 0.66)**  | .005  | 0.70<br>(0.35, 1.04)      | <.001 | 0.62<br>(-0.09, 1.32)† | .09   |
| Not applicable (partially vaccinated)                  | -0.71<br>(-1.22, -0.19)** | .007  | -0.19<br>(-0.42, 0.03)† | .09   | -0.47<br>(-0.76, -0.18)** | .002  | -0.28<br>(-0.87, 0.31) | .34   |
